# Supplementary material
Source: HighWire-hosted journal article supplement (https://cmaj.ca/highwire/filestream/58465/field_highwire_adjunct_files/0/pg358.pdf)
Supplement: pg358.pdf [file pg358.pdf]

## PRODUCTION

Production Manager • Gestionnaire de la production  
Kathryn A. Freamo

Production Assistants • Assistantes à la production  
Nicole Barbeau, Lianne Johnsen, Carole Lalonde

## ADVERTISING • PUBLICITÉ

Manager, Journal Advertising  
Gestionnaire, Annonces publicitaires  
Beverley Kirkpatrick

Coordinator, Display Advertising  
Coordonnatrice de la publicité  
Nancy Pope

Assistant Manager, Classified Advertising  
Gestionnaire adjointe, annonces classées  
Deborah Rodd

613 731-9331, fax 613 565-7488  
advertising@cma.ca

For information on how to advertise  
in any of the CMA journals  
[www.cma.ca](http://www.cma.ca)

Pour savoir comment placer une annonce  
dans les revues publiées par l'AMC  
[www.cma.ca](http://www.cma.ca)

Marketing and Advertising Sales  
Marketing et publicité  
Keith Health Care Inc.

|                  |                  |
|------------------|------------------|
| <b>Toronto</b>   | <b>Montréal</b>  |
| 905 278-6700     | 514 624-6979     |
| 800 661-5004     | 877 761-0447     |
| fax 905 278-4850 | fax 514 624-6707 |

All prescription drug advertisements have been cleared by the Pharmaceutical Advertising Advisory Board.

Toutes les annonces de médicaments prescrits ont été approuvées par le Conseil consultatif de publicité pharmaceutique.

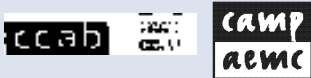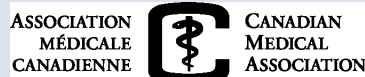

President • Président  
Allon Reddoch, MD

Secretary General • Secrétaire général  
Peter W. Vaughan, MD, MPH

Director, Professional Development  
Directeur, Développement professionnel  
Barbara Drew

Manager, Publishing Services  
Gestionnaire, Services de publication  
Jill Rafuse

Publications Committee • Comité des publications  
Stuart M. MacLeod, MD (Chairman • Président)  
Henry Haddad, MD  
Philip F. Hall, MD  
Barbara P. Lent, MD  
D'Arcy Lawrence Little, MD  
Jonathan L. Meakins, MD  
Mark Roper, MD  
W. Grant Thompson, MD

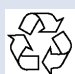

Printed on recycled paper • Imprimé sur papier recyclé

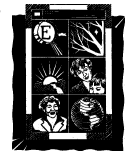

## D c s, avis de d c s, loges fun bres et notices n crologiques

Le journal a publié son premier avis de décès en janvier 1911, dans son tout premier numéro. L'avis se lisait ainsi: «Le D<sup>r</sup> H.D. Ayre, de Regina, qui avait subi une fracture de la jambe l'année dernière lorsque son cheval s'était emballé, est mort le 1<sup>er</sup> décembre 1910 des suites de l'accident. Le D<sup>r</sup> Ayre a été pendant 20 ans membre de la police à cheval du Nord-Ouest et, après avoir pris sa retraite, il a travaillé auprès du Service vétérinaire du Dominion».<sup>1</sup> Depuis, nous publions presque continuellement de brefs avis de décès.

Il arrive à l'occasion que des amis et des proches des disparus nous prennent à partie en nous accusant d'avoir fait peu de cas de leurs êtres chers. C'est toutefois toujours ce qui se produit avec un avis de décès. Nous n'avons tout simplement pas d'accès facile à des renseignements plus exhaustifs sur la vie des médecins décédés, sauf si un collègue ou un parent nous les fournit, ce qui se produit rarement. Sur les 400 avis publiés l'année dernière, nous avons reçu de l'information de nos lecteurs dans quelques cas seulement.

Que dire des disparus? Outre le nom de la personne décédée, l'avis de décès mentionne habituellement sa faculté de médecine, l'année de son diplôme, ses affiliations professionnelles, les personnes qui lui survivent et la date du décès. On a laissé tomber à un moment donné la cause du décès. Il nous semble toutefois que ces renseignements intéresseraient les lecteurs et seraient raisonnablement exacts — sans toutefois l'être complètement.<sup>2</sup> C'est pourquoi les futurs avis indiqueront la cause du décès lorsque ces renseignements sont disponibles.

Les éloges funèbres visent toujours à faire les louanges des disparus. Nous reconnaissons en avoir publié quelques-uns — listes de distinctions profession-

nelles, de nominations à des hôpitaux et d'autres réalisations tangibles. Par leur forme et leur objet même, les éloges funèbres présentent une image incomplète et partielle d'une vie. Nous sommes donc moins enclins à les publier.

Nous apprécions toutefois une bonne notice nécrologique et nous sommes heureux de rendre hommage à nos défunts collègues en publiant les souvenirs de leurs pairs et de leurs proches. Nous encourageons les lecteurs et les proches des disparus à nous faire parvenir des notices biographiques d'au plus 200 mots, que nous étudierons. Même si nous ne pouvons les publier tous, nous serons à l'affût de textes frappants et bien rédigés qui portent davantage sur la personne que sur ses réalisations. Par exemple, les D<sup>rs</sup> Archibald Young et Albert Phelps se sont rappelé John Grandy, leur collègue de Chilliwack (C.-B.) en ces termes: «Il était le médecin rural "complet", s'acquittant de ses fonctions à pied, en modèle T, à cheval et en traîneau l'hiver. Piégé à la campagne, John n'hésitait pas à partager un lit avec les membres de la famille d'un fermier. Il pouvait mettre à contribution son excellente formation, qui s'appuyait sur ses talents innés et ses connaissances, pour improviser et pour répondre aux besoins médicaux de sa communauté».<sup>3</sup> En 65 mots, les collègues du D<sup>r</sup> Grandy ont présenté une image remarquable d'un médecin qui avait bien servi ses patients.

Il faut présenter les notices nécrologiques à Patrick Sullivan (fax : 613 565-2382; [sullip@cma.ca](mailto:sullip@cma.ca)).

### Références

1. D<sup>r</sup> H.D. Ayre [notice nécrologique]. *JAMC* 1911;1(1):90.
2. MyersKA, Farquhar DRE. Improving the accuracy of death certification. *JAMC* 1998; 158(10):1317-23.
3. Grandy, John D [notice nécrologique]. *JAMC* 1999;161(1):111.
